# Supplementary material
Source: Research Square preprint supplement (doi:10.21203/rs.3.rs-10233159/v1)
Supplement: Supplementary file 1 [file 1f804fb7d2659079c4285359.docx]

**Supplementary Table 1.** Baseline Demographics and Clinical Characteristics of the Enrolled Patients

| Characteristic | Cilostazol/Rosuvastatin combination therapy  (N=130) | Rosuvastatin  monotherapy  (N=130) | P value |
| --- | --- | --- | --- |
| Age, years | 69.6 ± 8.4 | 68.9 ± 10.1 | 0.528 |
| Male | 117 (90.0) | 114 (87.7) | 0.694 |
| BMI, kg/m² | 24.5 ± 3.4 | 24.1 ± 3.4 | 0.295 |
| Hypertension | 98 (75.4) | 93 (71.5) | 0.574 |
| Diabetes mellitus | 70 (53.8) | 72 (55.4) | 0.901 |
| Coronary artery disease | 30 (23.1) | 35 (26.9) | 0.567 |
| Atrial fibrillation | 9 (6.9) | 6 (4.6) | 0.595 |
| Cerebrovascular disease | 12 (9.2) | 6 (4.6) | 0.222 |
| Chronic kidney disease | 13 (10.0) | 9 (6.9) | 0.504 |
| COPD | 5 (3.8) | 6 (4.6) | 1.000 |
| PAD presentation  Rutherford 2  Rutherford 3 | 62 (47.7)  68 (52.3) | 68 (52.3)  62 (47.7) | 0.457 |
| PAD duration, years | 3.9 ± 4.2 | 4.3 ± 4.7 | 0.445 |
| Medications |  |  |  |
| Prior statin therapy  Rosuvastatin  Atorvastatin  Others | 46 (35.4)  46 (35.4)  40 (30.8) | 43 (33.1)  43 (33.1)  47 (36.2) | 0.639 |
| Assigned rosuvastatin dose |  |  |  |
| 10 mg | 75 (57.7) | 74 (56.9) | 1.000 |
| 20 mg | 55 (42.3) | 56 (43.1) |  |
| Antiplatelet agent | 84 (64.6) | 92 (70.8) | 0.289 |

Values are mean ± SD or number (%). P values were obtained by using the independent t-test for continuous variables and the chi-square test (or Fisher's exact test where applicable) for categorical variables.

BMI, body mass index; COPD, chronic obstructive pulmonary disease; PAD, peripheral artery disease.

**Supplementary Table 2.** KPAQ Domain Scores at Baseline and Week 24

|  | Cilostazol/Rosuvastatin  combination therapy  (n = 114) | Rosuvastatin  monotherapy  (n = 118) | LS Mean Difference (95% CI) | P value a |
| --- | --- | --- | --- | --- |
| Physical Function (0-100) |  |  |  |  |
| Baseline | 41.1 ± 18.1 | 39.3 ± 16.4 |  |  |
| Week 24 | 55.0 ± 20.5 | 47.3 ± 21.2 |  |  |
| Change from baseline | 13.9 ± 18.1 | 8.0 ± 21.3 | 6.8 (2.0 to 11.6) | 0.048 |
| Symptom (0-100) |  |  |  |  |
| Baseline | 51.0 ± 16.6 | 50.4 ± 18.5 |  |  |
| Week 24 | 67.4 ± 19.1 | 63.2 ± 18.6 |  |  |
| Change from baseline | 16.5 ± 19.0 | 12.8 ± 17.8 | 3.9 (−0.3 to 8.2) | 0.094 |
| Quality of Life (0-100) |  |  |  |  |
| Baseline | 43.2 ± 14.6 | 40.8 ± 16.0 |  |  |
| Week 24 | 57.3 ± 16.3 | 49.3 ± 18.5 |  |  |
| Change from baseline | 14.1 ± 16.5 | 8.5 ± 15.1 | 6.5 (2.7 to 10.4) | 0.002 |
| Social Limitation (0-100) |  |  |  |  |
| Baseline | 55.0 ± 22.4 | 52.1 ± 21.4 |  |  |
| Week 24 | 70.0 ± 21.4 | 64.7 ± 23.1 |  |  |
| Change from baseline | 15.0 ± 22.9 | 12.7 ± 23.3 | 4.0 (−1.4 to 9.5) | 0.273 |
| Symptom Stability (0-100) |  |  |  |  |
| Baseline | 49.6 ± 11.5 | 51.5 ± 10.5 |  |  |
| Week 24 | 64.0 ± 17.9 | 63.3 ± 20.6 |  |  |
| Change from baseline | 14.5 ± 21.3 | 11.9 ± 22.3 | 0.9 (−4.1 to 6.0) | 0.926 |
| Treatment Satisfaction (0-100) |  |  |  |  |
| Baseline | 49.3 ± 14.3 | 52.4 ± 18.8 |  |  |
| Week 24 | 66.0 ± 20.1 | 61.2 ± 20.1 |  |  |
| Change from baseline | 16.7 ± 19.9 | 8.8 ± 19.9 | 6.4 (1.7 to 11.2) | 0.012 |

Values are mean ± SD. Change from baseline indicates absolute change in scores from baseline at Week 24.

a LS Mean Difference (95% CI) and P value from Rank-ANCOVA, adjusted for rosuvastatin dose and baseline value.

KPAQ, Korean Peripheral Artery Questionnaire; LS, least squares mean; CI, confidence interval.

**Supplementary Table 3.** KPAQ Summary Scores Change from Baseline Over Time

|  | Cilostazol/Rosuvastatin  combination therapy  (n = 114) | Rosuvastatin  monotherapy  (n = 118) | P value a |
| --- | --- | --- | --- |
| Week 4 |  |  |  |
| Change from baseline | +6.8 ± 11.0 | +4.6 ± 10.8 | 0.169 |
| Week 8 |  |  |  |
| Change from baseline | +9.2 ± 10.8 | +7.7 ± 12.3 | 0.174 |
| Week 12 |  |  |  |
| Change from baseline | +12.6 ± 12.8 | +8.1 ± 14.3 | 0.017 |
| Week 24 |  |  |  |
| Change from baseline | +15.4 ± 14.4 | +10.6 ± 14.7 |  |
| LS Mean change ± SE | 15.5 ± 1.3 | 10.2 ± 1.3 | 0.003 |

Values are mean ± SD. LS Mean change is model-estimated ± SE. Change from baseline indicates change in score from baseline at follow-up.

a P values from Rank-ANCOVA (Weeks 4, 8, 12) or ANCOVA (Week 24), adjusted for rosuvastatin dose and baseline KPAQ summary score.

KPAQ, Korean Peripheral Artery Questionnaire; LS, least squares mean; SE, standard error.

**Supplementary Table 4.** Adverse events

|  | Cilostazol/Rosuvastatin combination therapy (N=130) | Rosuvastatin  monotherapy  (N=130) | P valueª |
| --- | --- | --- | --- |
| Any TEAE | 62 (47.7) | 48 (36.9) | 0.079 |
| Any ADR | 36 (27.7) | 23 (17.7) | 0.054 |
| Serious AE | 8 (6.2) | 7 (5.4) | 0.790 |
| AE leading to discontinuation | 8 (6.2) | 5 (3.8) | 0.393 |
| Death | 0 | 1 (0.8) | 1.000 |
| Common TEAEs (≥2 patients in either group) |  |  |  |
| Diarrhea | 8 (6.2) | 1 (0.8) | 0.036 |
| Headache | 7 (5.4) | 1 (0.8) | 0.066 |
| Dizziness | 6 (4.6) | 3 (2.3) | 0.500 |
| Pain in extremity | 1 (0.8) | 5 (3.8) | 0.213 |
| Back pain | 4 (3.1) | 1 (0.8) | 0.370 |
| Edema peripheral | 3 (2.3) | 1 (0.8) | 0.622 |
| Dyspepsia | 1 (0.8) | 3 (2.3) | 0.622 |
| Urinary tract infection | 0 | 3 (2.3) | 0.247 |
| Palpitations | 2 (1.5) | 0 | 0.498 |
| Liver enzyme elevation | 2 (1.5) | 0 | 0.498 |
| Hypoesthesia | 0 | 2 (1.5) | 0.498 |

Values are number (%).

ᵃ P values were obtained by using the chi-square test (or Fisher's exact test where applicable) for between-group comparisons.

TEAE, treatment-emergent adverse event; ADR, adverse drug reaction; AE, adverse event.

**
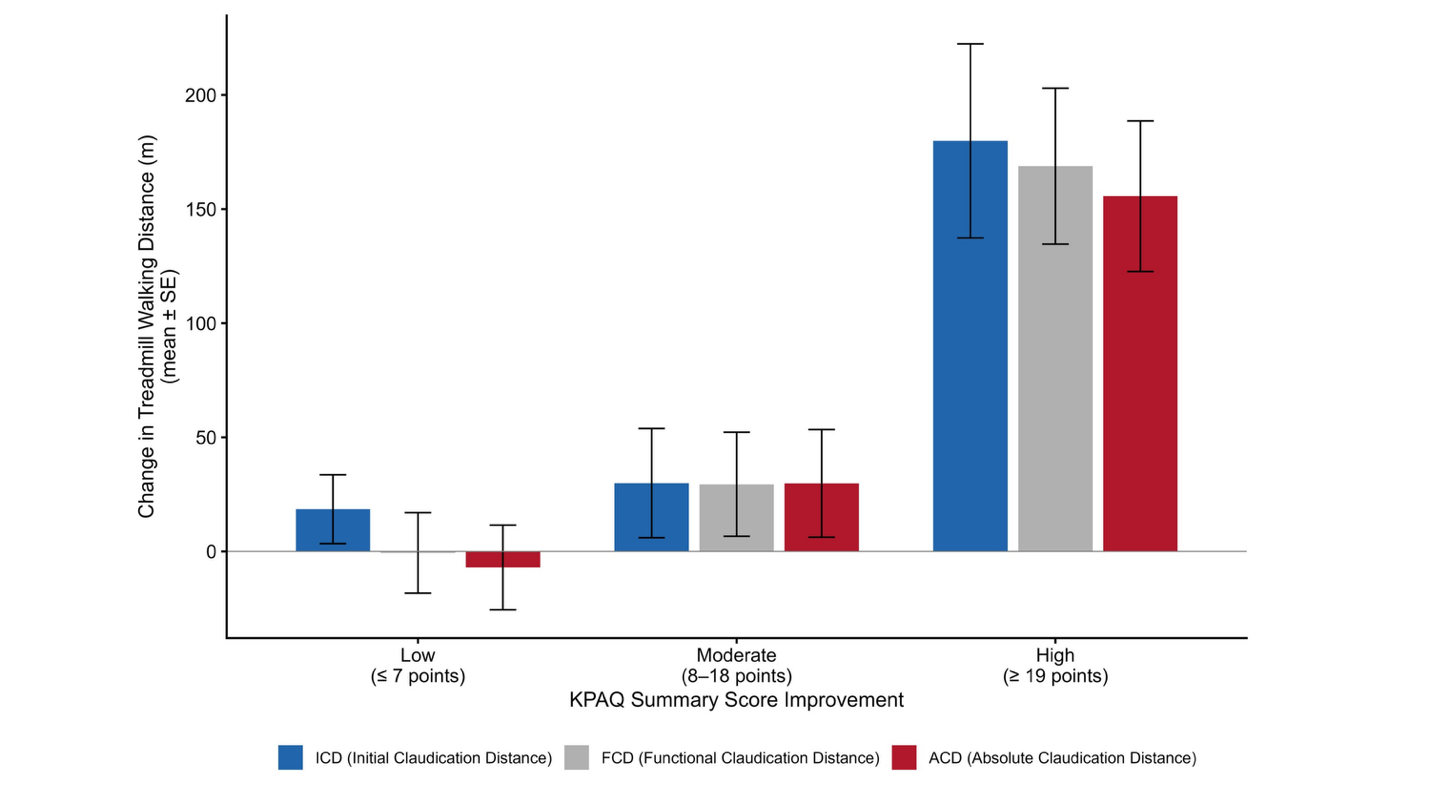
**

**Suppl. Fig. 1** Association Between KPAQ Summary Score Improvement and Treadmill Walking Distance at Week 24. Patients with available KPAQ and treadmill data at week 24 were divided into tertiles based on change in KPAQ summary score from baseline. Bars represent mean ± SE change from baseline in treadmill walking distance.

*Abbreviations: : ICD, initial claudication distance; FCD; functional claudication distance; ACD, absolute claudication distance; KPAQ, Korean Peripheral Artery Questionnaire; SE, standard error.*

**
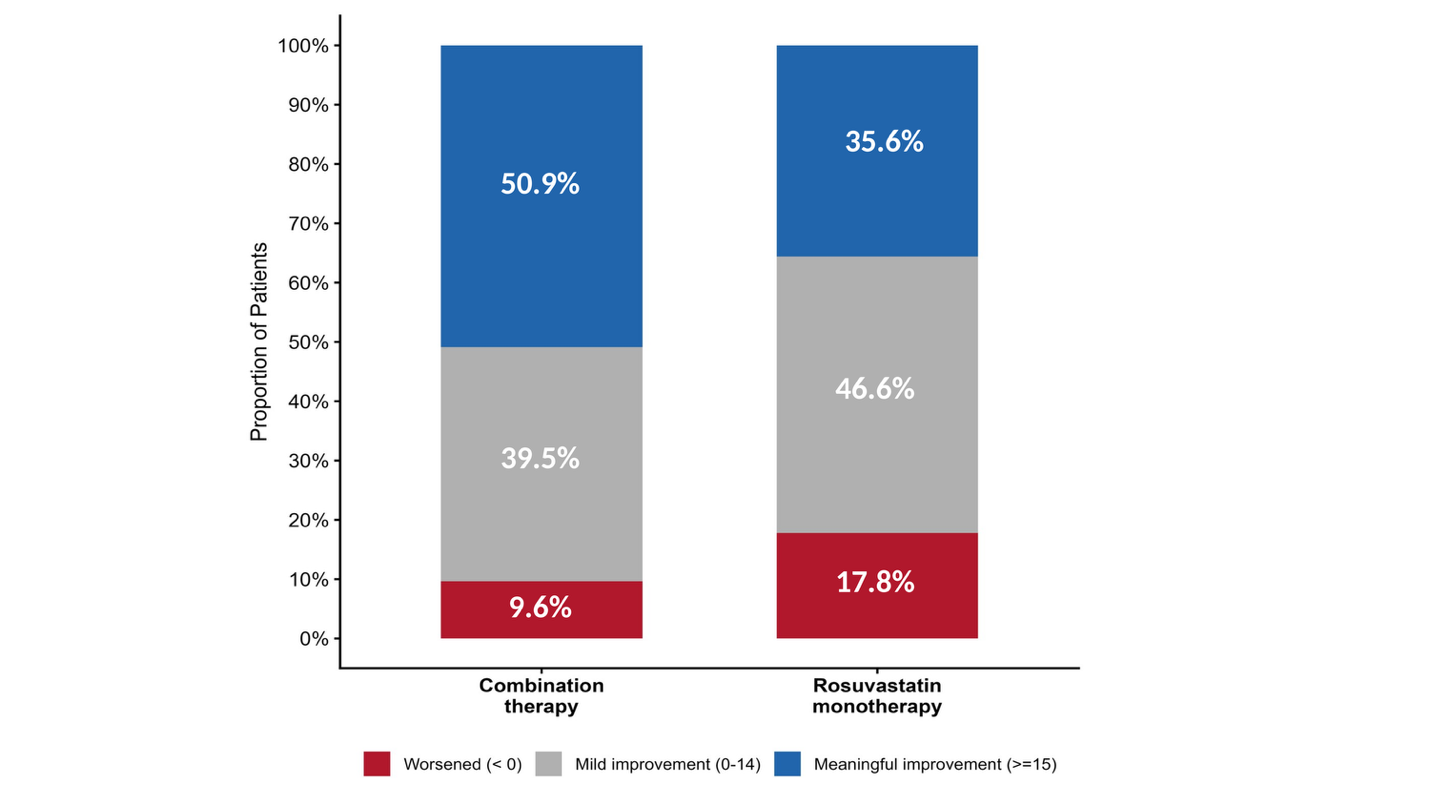
**

**Suppl. Fig. 2** Distribution of Individual KPAQ Summary Score Changes at Week 24. Patients were categorized into three groups based on change in KPAQ summary score from baseline: meaningful improvement (≥15 points), mild improvement (0-14 points), and worsened (<0 points).

*Abbreviations: KPAQ, Korean Peripheral Artery Questionnaire*

**
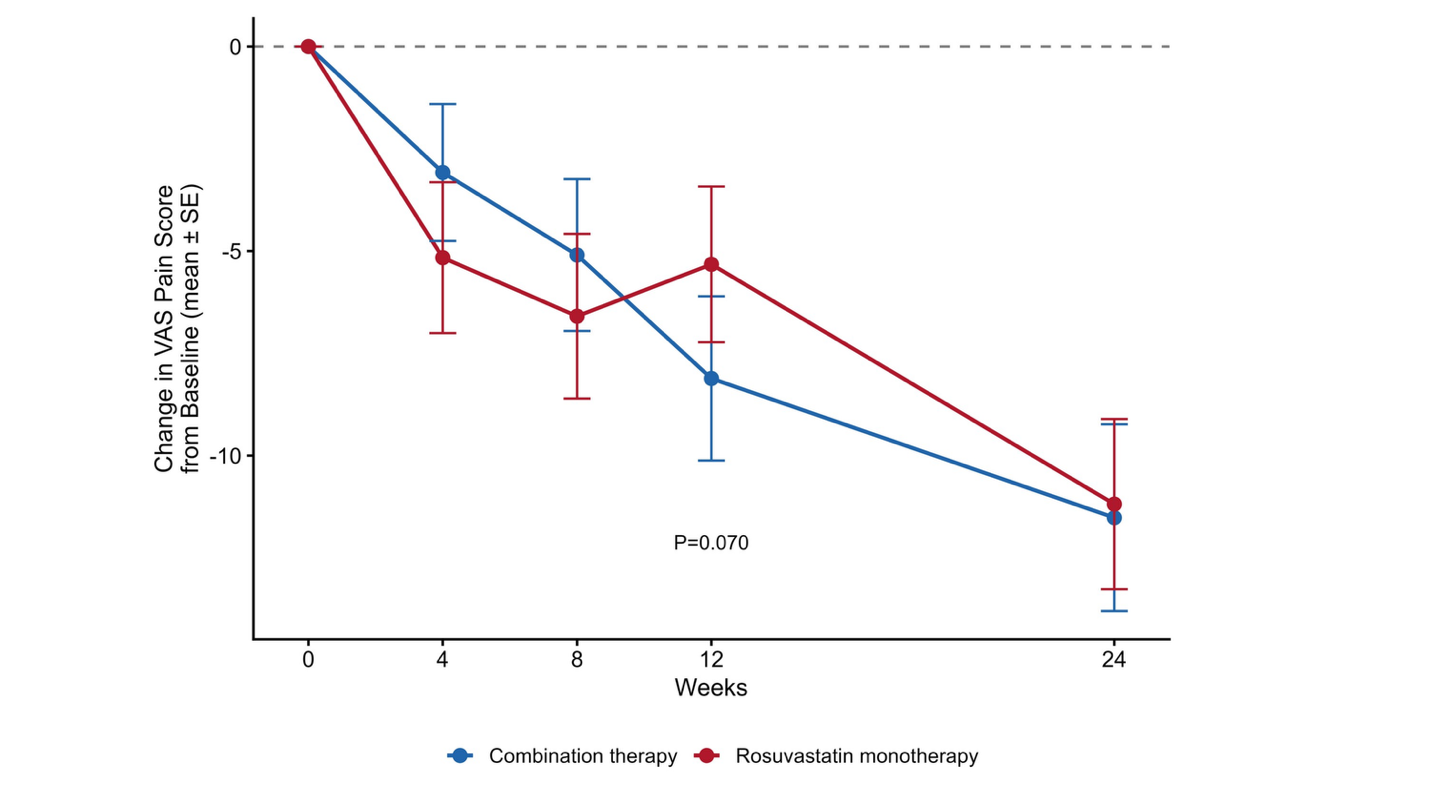
Suppl. Fig. 3** Change of VAS Pain Score from Baseline Over 24 Weeks. Data are presented as mean ± SE. P-values indicate between-group differences at each timepoint. N at each timepoint: Week 4 (126/129), week 8 (122/126), Week 12 (117/122), Week 24 (115/118).

*Abbreviations: : VAS, visual analogue scale; SE, standard error*
